# Supplementary material for: A specific box switches the cell fate determining activity of XOTX2 and XOTX5b in the Xenopus retina
Source: PubMed Central journal article supplement (PMC1929070; doi:10.1186/1749-8104-2-12), 2007-06-27
Supplement: 1749-8104-2-12-S2.pdf [file 1749-8104-2-12-S2.pdf]

## Amacrine cells

---

 One-way Analysis of Variance (ANOVA)
 

---

The P value is < 0.0001, considered extremely significant.  
 Variation among column means is significantly greater than expected by chance.

Tukey-Kramer Multiple Comparisons Test

If the value of q is greater than 4.140 then the P value is less than 0.05.

| Comparison                     | Mean Difference | q      | P value     |
|--------------------------------|-----------------|--------|-------------|
| GFP vs Xotx5b                  | 4.408           | 4.886  | * P<0.05    |
| GFP vs Xotx2                   | 1.738           | 2.012  | ns P>0.05   |
| GFP vs Xotx5b Mut3/1           | 3.486           | 3.926  | ns P>0.05   |
| GFP vs Xotx5b Mut2/1           | 2.644           | 2.621  | ns P>0.05   |
| GFP vs Xotx5b Mut1/4           | 6.631           | 7.083  | *** P<0.001 |
| Xotx5b vs Xotx2                | -2.670          | 3.091  | ns P>0.05   |
| Xotx5b vs Xotx5b Mut3/1        | -0.9213         | 1.038  | ns P>0.05   |
| Xotx5b vs Xotx5b Mut2/1        | -1.764          | 1.749  | ns P>0.05   |
| Xotx5b vs Xotx5b Mut1/4        | 2.223           | 2.375  | ns P>0.05   |
| Xotx2 vs Xotx5b Mut3/1         | 1.749           | 2.060  | ns P>0.05   |
| Xotx2 vs Xotx5b Mut2/1         | 0.9062          | 0.9300 | ns P>0.05   |
| Xotx2 vs Xotx5b Mut1/4         | 4.893           | 5.441  | ** P<0.01   |
| Xotx5b Mut3/1 vs Xotx5b Mut2/1 | -0.8426         | 0.8460 | ns P>0.05   |
| Xotx5b Mut3/1 vs Xotx5b Mut1/4 | 3.144           | 3.409  | ns P>0.05   |
| Xotx5b Mut2/1 vs Xotx5b Mut1/4 | 3.987           | 3.837  | ns P>0.05   |

| Difference                    | Mean Difference | 95% Confidence Interval From | To     |
|-------------------------------|-----------------|------------------------------|--------|
| GFP - Xotx5b                  | 4.408           | 0.6731                       | 8.142  |
| GFP - Xotx2                   | 1.738           | -1.838                       | 5.313  |
| GFP - Xotx5b Mut3/1           | 3.486           | -0.1894                      | 7.162  |
| GFP - Xotx5b Mut2/1           | 2.644           | -1.532                       | 6.819  |
| GFP - Xotx5b Mut1/4           | 6.631           | 2.755                        | 10.506 |
| Xotx5b - Xotx2                | -2.670          | -6.246                       | 0.9055 |
| Xotx5b - Xotx5b Mut3/1        | -0.9213         | -4.597                       | 2.754  |
| Xotx5b - Xotx5b Mut2/1        | -1.764          | -5.939                       | 2.411  |
| Xotx5b - Xotx5b Mut1/4        | 2.223           | -1.652                       | 6.099  |
| Xotx2 - Xotx5b Mut3/1         | 1.749           | -1.765                       | 5.263  |
| Xotx2 - Xotx5b Mut2/1         | 0.9062          | -3.128                       | 4.940  |
| Xotx2 - Xotx5b Mut1/4         | 4.893           | 1.171                        | 8.616  |
| Xotx5b Mut3/1 - Xotx5b Mut2/1 | -0.8426         | -4.965                       | 3.280  |
| Xotx5b Mut3/1 - Xotx5b Mut1/4 | 3.144           | -0.6744                      | 6.963  |
| Xotx5b Mut2/1 - Xotx5b Mut1/4 | 3.987           | -0.3149                      | 8.289  |

Assumption test: Are the standard deviations of the groups equal?

ANOVA assumes that the data are sampled from populations with identical SDs. This assumption is tested using the method of Bartlett.

Bartlett statistic (corrected) = 4.035

The P value is 0.5444.

Bartlett's test suggests that the differences among the SDs is not significant.

Assumption test: Are the data sampled from Gaussian distributions?

ANOVA assumes that the data are sampled from populations that follow Gaussian distributions. This assumption is tested using the method Kolmogorov and Smirnov:

| Group         | KS      | P Value | Passed normality test? |
|---------------|---------|---------|------------------------|
| GFP           | 0.1229  | >0.10   | Yes                    |
| Xotx5b        | 0.2231  | >0.10   | Yes                    |
| Xotx2         | 0.1431  | >0.10   | Yes                    |
| Xotx5b Mut3/1 | 0.09203 | >0.10   | Yes                    |
| Xotx5b Mut2/1 | 0.1779  | >0.10   | Yes                    |
| Xotx5b Mut1/4 | 0.1899  | >0.10   | Yes                    |

Intermediate calculations. ANOVA table

| Source of variation          | Degrees of freedom | Sum of squares | Mean square |
|------------------------------|--------------------|----------------|-------------|
| Treatments (between columns) | 5                  | 369.57         | 73.914      |
| Residuals (within columns)   | 81                 | 988.88         | 12.208      |
| Total                        | 86                 | 1358.5         |             |

$F = 6.054 = (MS_{treatment} / MS_{residual})$

Summary of Data

| Group         | Number of Points | Mean   | Standard Deviation | Standard Error of Mean | Median |
|---------------|------------------|--------|--------------------|------------------------|--------|
| GFP           | 15               | 16.218 | 3.790              | 0.9786                 | 16.102 |
| Xotx5b        | 15               | 11.810 | 3.601              | 0.9299                 | 12.150 |
| Xotx2         | 18               | 14.480 | 2.553              | 0.6017                 | 14.538 |
| Xotx5b Mut3/1 | 16               | 12.731 | 3.198              | 0.7995                 | 12.641 |
| Xotx5b Mut2/1 | 10               | 13.574 | 3.989              | 1.262                  | 13.985 |
| Xotx5b Mut1/4 | 13               | 9.587  | 4.070              | 1.129                  | 10.227 |

| Group         | Minimum | Maximum | 95% Confidence Interval |        |
|---------------|---------|---------|-------------------------|--------|
|               |         |         | From                    | To     |
| GFP           | 9.524   | 22.609  | 14.118                  | 18.317 |
| Xotx5b        | 1.961   | 18.293  | 9.815                   | 13.805 |
| Xotx2         | 7.692   | 20.430  | 13.210                  | 15.750 |
| Xotx5b Mut3/1 | 7.895   | 19.298  | 11.028                  | 14.435 |
| Xotx5b Mut2/1 | 6.897   | 20.000  | 10.720                  | 16.427 |
| Xotx5b Mut1/4 | 0.000   | 15.126  | 7.127                   | 12.046 |

\* \* \*



## Bipolar cells

---

 One-way Analysis of Variance (ANOVA)
 

---

The P value is < 0.0001, considered extremely significant.  
 Variation among column means is significantly greater than expected by chance.

Tukey-Kramer Multiple Comparisons Test

If the value of q is greater than 4.140 then the P value is less than 0.05.

| Comparison                     | Mean Difference | q      | P value     |
|--------------------------------|-----------------|--------|-------------|
| GFP vs Xotx5b                  | -1.456          | 1.606  | ns P>0.05   |
| GFP vs Xotx2                   | -9.206          | 10.606 | *** P<0.001 |
| GFP vs Xotx5b Mut3/1           | -11.050         | 12.383 | *** P<0.001 |
| GFP vs Xotx5b Mut2/1           | -8.149          | 8.039  | *** P<0.001 |
| GFP vs Xotx5b Mut1/4           | -5.878          | 6.248  | *** P<0.001 |
| Xotx5b vs Xotx2                | -7.751          | 8.929  | *** P<0.001 |
| Xotx5b vs Xotx5b Mut3/1        | -9.594          | 10.751 | *** P<0.001 |
| Xotx5b vs Xotx5b Mut2/1        | -6.693          | 6.603  | *** P<0.001 |
| Xotx5b vs Xotx5b Mut1/4        | -4.422          | 4.700  | * P<0.05    |
| Xotx2 vs Xotx5b Mut3/1         | -1.843          | 2.161  | ns P>0.05   |
| Xotx2 vs Xotx5b Mut2/1         | 1.058           | 1.080  | ns P>0.05   |
| Xotx2 vs Xotx5b Mut1/4         | 3.328           | 3.683  | ns P>0.05   |
| Xotx5b Mut3/1 vs Xotx5b Mut2/1 | 2.901           | 2.899  | ns P>0.05   |
| Xotx5b Mut3/1 vs Xotx5b Mut1/4 | 5.172           | 5.578  | ** P<0.01   |
| Xotx5b Mut2/1 vs Xotx5b Mut1/4 | 2.271           | 2.174  | ns P>0.05   |

| Difference                    | Mean Difference | 95% Confidence Interval From | To      |
|-------------------------------|-----------------|------------------------------|---------|
| GFP - Xotx5b                  | -1.456          | -5.209                       | 2.297   |
| GFP - Xotx2                   | -9.206          | -12.800                      | -5.613  |
| GFP - Xotx5b Mut3/1           | -11.050         | -14.744                      | -7.356  |
| GFP - Xotx5b Mut2/1           | -8.149          | -12.345                      | -3.953  |
| GFP - Xotx5b Mut1/4           | -5.878          | -9.773                       | -1.983  |
| Xotx5b - Xotx2                | -7.751          | -11.344                      | -4.157  |
| Xotx5b - Xotx5b Mut3/1        | -9.594          | -13.288                      | -5.900  |
| Xotx5b - Xotx5b Mut2/1        | -6.693          | -10.889                      | -2.497  |
| Xotx5b - Xotx5b Mut1/4        | -4.422          | -8.317                       | -0.5276 |
| Xotx2 - Xotx5b Mut3/1         | -1.843          | -5.375                       | 1.688   |
| Xotx2 - Xotx5b Mut2/1         | 1.058           | -2.996                       | 5.112   |
| Xotx2 - Xotx5b Mut1/4         | 3.328           | -0.4126                      | 7.069   |
| Xotx5b Mut3/1 - Xotx5b Mut2/1 | 2.901           | -1.242                       | 7.044   |
| Xotx5b Mut3/1 - Xotx5b Mut1/4 | 5.172           | 1.334                        | 9.009   |
| Xotx5b Mut2/1 - Xotx5b Mut1/4 | 2.271           | -2.053                       | 6.594   |

Assumption test: Are the standard deviations of the groups equal?

ANOVA assumes that the data are sampled from populations with identical SDs. This assumption is tested using the method of Bartlett.

Bartlett statistic (corrected) = 6.676

The P value is 0.2459.

Bartlett's test suggests that the differences among the SDs is not significant.

Assumption test: Are the data sampled from Gaussian distributions?

ANOVA assumes that the data are sampled from populations that follow Gaussian distributions. This assumption is tested using the method Kolmogorov and Smirnov:

| Group         | KS     | P Value | Passed normality test? |
|---------------|--------|---------|------------------------|
| GFP           | 0.1836 | >0.10   | Yes                    |
| Xotx5b        | 0.1675 | >0.10   | Yes                    |
| Xotx2         | 0.2534 | >0.10   | Yes                    |
| Xotx5b Mut3/1 | 0.1620 | >0.10   | Yes                    |
| Xotx5b Mut2/1 | 0.1865 | >0.10   | Yes                    |
| Xotx5b Mut1/4 | 0.1854 | >0.10   | Yes                    |

Intermediate calculations. ANOVA table

| Source of variation          | Degrees of freedom | Sum of squares | Mean square |
|------------------------------|--------------------|----------------|-------------|
| Treatments (between columns) | 5                  | 1489.2         | 297.83      |
| Residuals (within columns)   | 81                 | 998.68         | 12.329      |
| Total                        | 86                 | 2487.8         |             |

$F = 24.156 = (MStreatment / MSresidual)$

Summary of Data

| Group         | Number of Points | Mean   | Standard Deviation | Standard Error of Mean | Median |
|---------------|------------------|--------|--------------------|------------------------|--------|
| GFP           | 15               | 29.028 | 2.034              | 0.5251                 | 28.571 |
| Xotx5b        | 15               | 30.484 | 3.622              | 0.9352                 | 31.148 |
| Xotx2         | 18               | 38.234 | 3.532              | 0.8326                 | 38.152 |
| Xotx5b Mut3/1 | 16               | 40.077 | 3.871              | 0.9678                 | 41.090 |
| Xotx5b Mut2/1 | 10               | 37.176 | 4.050              | 1.281                  | 36.826 |
| Xotx5b Mut1/4 | 13               | 34.906 | 3.793              | 1.052                  | 35.106 |

| Group         | Minimum | Maximum | 95% Confidence Interval |        |
|---------------|---------|---------|-------------------------|--------|
|               |         |         | From                    | To     |
| GFP           | 26.667  | 33.333  | 27.901                  | 30.154 |
| Xotx5b        | 24.735  | 35.000  | 28.478                  | 32.490 |
| Xotx2         | 34.409  | 50.000  | 36.477                  | 39.991 |
| Xotx5b Mut3/1 | 33.824  | 45.455  | 38.015                  | 42.140 |
| Xotx5b Mut2/1 | 32.632  | 44.828  | 34.280                  | 40.073 |
| Xotx5b Mut1/4 | 25.210  | 39.773  | 32.614                  | 37.198 |

\* \* \*



Photoreceptors

One-way Analysis of Variance (ANOVA)

The P value is < 0.0001, considered extremely significant. Variation among column means is significantly greater than expected by chance.

Tukey-Kramer Multiple Comparisons Test

If the value of q is greater than 4.140 then the P value is less than 0.05.

| Comparison                     | Mean Difference | q      | P value     |
|--------------------------------|-----------------|--------|-------------|
| GFP vs Xotx5b                  | -9.406          | 10.855 | *** P<0.001 |
| GFP vs Xotx2                   | 6.430           | 7.750  | *** P<0.001 |
| GFP vs Xotx5b Mut3/1           | 4.346           | 5.096  | ** P<0.01   |
| GFP vs Xotx5b Mut2/1           | 3.028           | 3.125  | ns P>0.05   |
| GFP vs Xotx5b Mut1/4           | -4.060          | 4.515  | * P<0.05    |
| Xotx5b vs Xotx2                | 15.835          | 19.088 | *** P<0.001 |
| Xotx5b vs Xotx5b Mut3/1        | 13.752          | 16.124 | *** P<0.001 |
| Xotx5b vs Xotx5b Mut2/1        | 12.434          | 12.834 | *** P<0.001 |
| Xotx5b vs Xotx5b Mut1/4        | 5.346           | 5.945  | ** P<0.01   |
| Xotx2 vs Xotx5b Mut3/1         | -2.084          | 2.556  | ns P>0.05   |
| Xotx2 vs Xotx5b Mut2/1         | -3.402          | 3.635  | ns P>0.05   |
| Xotx2 vs Xotx5b Mut1/4         | -10.489         | 12.144 | *** P<0.001 |
| Xotx5b Mut3/1 vs Xotx5b Mut2/1 | -1.318          | 1.378  | ns P>0.05   |
| Xotx5b Mut3/1 vs Xotx5b Mut1/4 | -8.406          | 9.486  | *** P<0.001 |
| Xotx5b Mut2/1 vs Xotx5b Mut1/4 | -7.088          | 7.101  | *** P<0.001 |

| Difference                    | Mean Difference | 95% Confidence Interval From | To      |
|-------------------------------|-----------------|------------------------------|---------|
| GFP - Xotx5b                  | -9.406          | -12.993                      | -5.819  |
| GFP - Xotx2                   | 6.430           | 2.996                        | 9.864   |
| GFP - Xotx5b Mut3/1           | 4.346           | 0.8155                       | 7.876   |
| GFP - Xotx5b Mut2/1           | 3.028           | -0.9824                      | 7.038   |
| GFP - Xotx5b Mut1/4           | -4.060          | -7.782                       | -0.3373 |
| Xotx5b - Xotx2                | 15.835          | 12.401                       | 19.270  |
| Xotx5b - Xotx5b Mut3/1        | 13.752          | 10.221                       | 17.282  |
| Xotx5b - Xotx5b Mut2/1        | 12.434          | 8.423                        | 16.444  |
| Xotx5b - Xotx5b Mut1/4        | 5.346           | 1.624                        | 9.068   |
| Xotx2 - Xotx5b Mut3/1         | -2.084          | -5.459                       | 1.291   |
| Xotx2 - Xotx5b Mut2/1         | -3.402          | -7.276                       | 0.4725  |
| Xotx2 - Xotx5b Mut1/4         | -10.489         | -14.065                      | -6.914  |
| Xotx5b Mut3/1 - Xotx5b Mut2/1 | -1.318          | -5.278                       | 2.642   |
| Xotx5b Mut3/1 - Xotx5b Mut1/4 | -8.406          | -12.074                      | -4.738  |
| Xotx5b Mut2/1 - Xotx5b Mut1/4 | -7.088          | -11.220                      | -2.956  |

Assumption test: Are the standard deviations of the groups equal?

ANOVA assumes that the data are sampled from populations with identical SDs. This assumption is tested using the method of Bartlett.

Bartlett statistic (corrected) = 20.100

The P value is 0.0012.

Bartlett's test suggests that the differences among the SDs is very significant.

Since ANOVA assumes populations with equal SDs, you should consider transforming your data (reciprocal or log) or selecting a nonparametric test.

Assumption test: Are the data sampled from Gaussian distributions?

ANOVA assumes that the data are sampled from populations that follow Gaussian distributions. This assumption is tested using the method Kolmogorov and Smirnov:

| Group         | KS      | P Value | Passed normality test? |
|---------------|---------|---------|------------------------|
| GFP           | 0.08800 | >0.10   | Yes                    |
| Xotx5b        | 0.2178  | >0.10   | Yes                    |
| Xotx2         | 0.1602  | >0.10   | Yes                    |
| Xotx5b Mut3/1 | 0.2448  | >0.10   | Yes                    |
| Xotx5b Mut2/1 | 0.2367  | >0.10   | Yes                    |
| Xotx5b Mut1/4 | 0.1723  | >0.10   | Yes                    |

Intermediate calculations. ANOVA table

| Source of variation          | Degrees of freedom | Sum of squares | Mean square |
|------------------------------|--------------------|----------------|-------------|
| Treatments (between columns) | 5                  | 2673.9         | 534.78      |
| Residuals (within columns)   | 81                 | 912.27         | 11.263      |
| Total                        | 86                 | 3586.2         |             |

$F = 47.482 = (MS_{treatment} / MS_{residual})$

Summary of Data

| Group         | Number of Points | Mean   | Standard Deviation | Standard Error of Mean | Median |
|---------------|------------------|--------|--------------------|------------------------|--------|
| GFP           | 15               | 30.393 | 2.861              | 0.7388                 | 30.000 |
| Xotx5b        | 15               | 39.799 | 5.172              | 1.335                  | 38.000 |
| Xotx2         | 18               | 23.964 | 2.278              | 0.5370                 | 23.785 |
| Xotx5b Mut3/1 | 16               | 26.047 | 1.865              | 0.4663                 | 26.471 |
| Xotx5b Mut2/1 | 10               | 27.365 | 4.356              | 1.377                  | 29.217 |
| Xotx5b Mut1/4 | 13               | 34.453 | 3.055              | 0.8474                 | 35.498 |

| Group         | Minimum | Maximum | 95% Confidence Interval |        |
|---------------|---------|---------|-------------------------|--------|
|               |         |         | From                    | To     |
| GFP           | 26.271  | 35.766  | 28.809                  | 31.978 |
| Xotx5b        | 34.756  | 51.852  | 36.935                  | 42.663 |
| Xotx2         | 19.355  | 27.404  | 22.830                  | 25.097 |
| Xotx5b Mut3/1 | 21.635  | 28.788  | 25.054                  | 27.041 |
| Xotx5b Mut2/1 | 21.429  | 33.333  | 24.250                  | 30.481 |
| Xotx5b Mut1/4 | 30.120  | 40.000  | 32.607                  | 36.299 |



\* \* \*

Ganglion cells

One-way Analysis of Variance (ANOVA)

The P value is 0.0638, considered not quite significant. Variation among column means is not significantly greater than expected by chance.

Tukey-Kramer Multiple Comparisons Test

If the value of q is greater than 4.140 then the P value is less than 0.05.

| Comparison                     | Mean Difference | q      | P value   |
|--------------------------------|-----------------|--------|-----------|
| GFP vs Xotx5b                  | 4.113           | 4.066  | ns P>0.05 |
| GFP vs Xotx2                   | 2.634           | 2.719  | ns P>0.05 |
| GFP vs Xotx5b Mut3/1           | 1.983           | 1.992  | ns P>0.05 |
| GFP vs Xotx5b Mut2/1           | 0.2040          | 0.1804 | ns P>0.05 |
| GFP vs Xotx5b Mut1/4           | 2.317           | 2.207  | ns P>0.05 |
| Xotx5b vs Xotx2                | -1.479          | 1.527  | ns P>0.05 |
| Xotx5b vs Xotx5b Mut3/1        | -2.130          | 2.139  | ns P>0.05 |
| Xotx5b vs Xotx5b Mut2/1        | -3.909          | 3.456  | ns P>0.05 |
| Xotx5b vs Xotx5b Mut1/4        | -1.796          | 1.711  | ns P>0.05 |
| Xotx2 vs Xotx5b Mut3/1         | -0.6505         | 0.6833 | ns P>0.05 |
| Xotx2 vs Xotx5b Mut2/1         | -2.430          | 2.224  | ns P>0.05 |
| Xotx2 vs Xotx5b Mut1/4         | -0.3171         | 0.3144 | ns P>0.05 |
| Xotx5b Mut3/1 vs Xotx5b Mut2/1 | -1.779          | 1.593  | ns P>0.05 |
| Xotx5b Mut3/1 vs Xotx5b Mut1/4 | 0.3334          | 0.3223 | ns P>0.05 |
| Xotx5b Mut2/1 vs Xotx5b Mut1/4 | 2.113           | 1.813  | ns P>0.05 |

| Difference                    | Mean Difference | 95% Confidence Interval From | To     |
|-------------------------------|-----------------|------------------------------|--------|
| GFP - Xotx5b                  | 4.113           | -0.07486                     | 8.301  |
| GFP - Xotx2                   | 2.634           | -1.376                       | 6.644  |
| GFP - Xotx5b Mut3/1           | 1.983           | -2.139                       | 6.105  |
| GFP - Xotx5b Mut2/1           | 0.2040          | -4.478                       | 4.886  |
| GFP - Xotx5b Mut1/4           | 2.317           | -2.029                       | 6.663  |
| Xotx5b - Xotx2                | -1.479          | -5.489                       | 2.530  |
| Xotx5b - Xotx5b Mut3/1        | -2.130          | -6.252                       | 1.992  |
| Xotx5b - Xotx5b Mut2/1        | -3.909          | -8.591                       | 0.7732 |
| Xotx5b - Xotx5b Mut1/4        | -1.796          | -6.142                       | 2.550  |
| Xotx2 - Xotx5b Mut3/1         | -0.6505         | -4.591                       | 3.290  |
| Xotx2 - Xotx5b Mut2/1         | -2.430          | -6.953                       | 2.094  |
| Xotx2 - Xotx5b Mut1/4         | -0.3171         | -4.492                       | 3.857  |
| Xotx5b Mut3/1 - Xotx5b Mut2/1 | -1.779          | -6.403                       | 2.844  |
| Xotx5b Mut3/1 - Xotx5b Mut1/4 | 0.3334          | -3.949                       | 4.616  |
| Xotx5b Mut2/1 - Xotx5b Mut1/4 | 2.113           | -2.711                       | 6.937  |

Assumption test: Are the standard deviations of the groups equal?

ANOVA assumes that the data are sampled from populations with identical SDs. This assumption is tested using the method of Bartlett.

Bartlett statistic (corrected) = 4.566

The P value is 0.4711.

Bartlett's test suggests that the differences among the SDs is not significant.

Assumption test: Are the data sampled from Gaussian distributions?

ANOVA assumes that the data are sampled from populations that follow Gaussian distributions. This assumption is tested using the method Kolmogorov and Smirnov:

| Group         | KS     | P Value | Passed normality test? |
|---------------|--------|---------|------------------------|
| GFP           | 0.2191 | >0.10   | Yes                    |
| Xotx5b        | 0.1607 | >0.10   | Yes                    |
| Xotx2         | 0.1468 | >0.10   | Yes                    |
| Xotx5b Mut3/1 | 0.1222 | >0.10   | Yes                    |
| Xotx5b Mut2/1 | 0.1787 | >0.10   | Yes                    |
| Xotx5b Mut1/4 | 0.1387 | >0.10   | Yes                    |

Intermediate calculations. ANOVA table

| Source of variation          | Degrees of freedom | Sum of squares | Mean square |
|------------------------------|--------------------|----------------|-------------|
| Treatments (between columns) | 5                  | 167.76         | 33.553      |
| Residuals (within columns)   | 81                 | 1243.6         | 15.353      |
| Total                        | 86                 | 1411.4         |             |

$F = 2.185 = (MS_{treatment} / MS_{residual})$

Summary of Data

| Group         | Number of Points | Mean   | Standard Deviation | Standard Error of Mean | Median |
|---------------|------------------|--------|--------------------|------------------------|--------|
| GFP           | 15               | 15.242 | 3.480              | 0.8985                 | 14.365 |
| Xotx5b        | 15               | 11.129 | 3.422              | 0.8837                 | 10.448 |
| Xotx2         | 18               | 12.608 | 4.061              | 0.9571                 | 12.528 |
| Xotx5b Mut3/1 | 16               | 13.259 | 3.823              | 0.9557                 | 12.817 |
| Xotx5b Mut2/1 | 10               | 15.038 | 5.624              | 1.779                  | 15.733 |
| Xotx5b Mut1/4 | 13               | 12.925 | 3.239              | 0.8983                 | 12.766 |

| Group         | Minimum | Maximum | 95% Confidence Interval |        |
|---------------|---------|---------|-------------------------|--------|
|               |         |         | From                    | To     |
| GFP           | 11.429  | 23.810  | 13.315                  | 17.169 |
| Xotx5b        | 3.704   | 16.260  | 9.233                   | 13.024 |
| Xotx2         | 6.452   | 21.739  | 10.589                  | 14.628 |
| Xotx5b Mut3/1 | 6.667   | 19.663  | 11.222                  | 15.295 |
| Xotx5b Mut2/1 | 4.762   | 22.857  | 11.015                  | 19.061 |
| Xotx5b Mut1/4 | 8.081   | 17.647  | 10.968                  | 14.883 |

\* \* \*



Horizontal cells

One-way Analysis of Variance (ANOVA)

The P value is 0.0294, considered significant.  
 Variation among column means is significantly greater than expected by chance.

Tukey-Kramer Multiple Comparisons Test

If the value of q is greater than 4.140 then the P value is less than 0.05.

| Comparison                     | Mean Difference | q       | P value   |
|--------------------------------|-----------------|---------|-----------|
| GFP vs Xotx5b                  | 2.341           | 2.502   | ns P>0.05 |
| GFP vs Xotx2                   | -1.595          | 1.781   | ns P>0.05 |
| GFP vs Xotx5b Mut3/1           | 1.234           | 1.340   | ns P>0.05 |
| GFP vs Xotx5b Mut2/1           | 2.273           | 2.173   | ns P>0.05 |
| GFP vs Xotx5b Mut1/4           | 0.9899          | 1.020   | ns P>0.05 |
| Xotx5b vs Xotx2                | -3.936          | 4.394   | * P<0.05  |
| Xotx5b vs Xotx5b Mut3/1        | -1.107          | 1.202   | ns P>0.05 |
| Xotx5b vs Xotx5b Mut2/1        | -0.06787        | 0.06489 | ns P>0.05 |
| Xotx5b vs Xotx5b Mut1/4        | -1.351          | 1.391   | ns P>0.05 |
| Xotx2 vs Xotx5b Mut3/1         | 2.829           | 3.214   | ns P>0.05 |
| Xotx2 vs Xotx5b Mut2/1         | 3.868           | 3.828   | ns P>0.05 |
| Xotx2 vs Xotx5b Mut1/4         | 2.585           | 2.772   | ns P>0.05 |
| Xotx5b Mut3/1 vs Xotx5b Mut2/1 | 1.039           | 1.006   | ns P>0.05 |
| Xotx5b Mut3/1 vs Xotx5b Mut1/4 | -0.2439         | 0.2550  | ns P>0.05 |
| Xotx5b Mut2/1 vs Xotx5b Mut1/4 | -1.283          | 1.191   | ns P>0.05 |

| Difference                    | Mean Difference | 95% Confidence Interval From | To      |
|-------------------------------|-----------------|------------------------------|---------|
| GFP - Xotx5b                  | 2.341           | -1.532                       | 6.213   |
| GFP - Xotx2                   | -1.595          | -5.302                       | 2.112   |
| GFP - Xotx5b Mut3/1           | 1.234           | -2.577                       | 5.045   |
| GFP - Xotx5b Mut2/1           | 2.273           | -2.056                       | 6.602   |
| GFP - Xotx5b Mut1/4           | 0.9899          | -3.028                       | 5.008   |
| Xotx5b - Xotx2                | -3.936          | -7.643                       | -0.2283 |
| Xotx5b - Xotx5b Mut3/1        | -1.107          | -4.918                       | 2.704   |
| Xotx5b - Xotx5b Mut2/1        | -0.06787        | -4.397                       | 4.261   |
| Xotx5b - Xotx5b Mut1/4        | -1.351          | -5.369                       | 2.668   |
| Xotx2 - Xotx5b Mut3/1         | 2.829           | -0.8147                      | 6.472   |
| Xotx2 - Xotx5b Mut2/1         | 3.868           | -0.3147                      | 8.050   |
| Xotx2 - Xotx5b Mut1/4         | 2.585           | -1.275                       | 6.445   |
| Xotx5b Mut3/1 - Xotx5b Mut2/1 | 1.039           | -3.236                       | 5.314   |
| Xotx5b Mut3/1 - Xotx5b Mut1/4 | -0.2439         | -4.203                       | 3.716   |
| Xotx5b Mut2/1 - Xotx5b Mut1/4 | -1.283          | -5.743                       | 3.178   |

Assumption test: Are the standard deviations of the groups equal?

ANOVA assumes that the data are sampled from populations with identical SDs. This assumption is tested using the method of Bartlett.

Bartlett statistic (corrected) = 7.089

The P value is 0.2141.

Bartlett's test suggests that the differences among the SDs is not significant.

Assumption test: Are the data sampled from Gaussian distributions?

ANOVA assumes that the data are sampled from populations that follow Gaussian distributions. This assumption is tested using the method Kolmogorov and Smirnov:

| Group         | KS     | P Value | Passed normality test? |
|---------------|--------|---------|------------------------|
| GFP           | 0.1247 | >0.10   | Yes                    |
| Xotx5b        | 0.1306 | >0.10   | Yes                    |
| Xotx2         | 0.2069 | >0.10   | Yes                    |
| Xotx5b Mut3/1 | 0.2148 | >0.10   | Yes                    |
| Xotx5b Mut2/1 | 0.2246 | >0.10   | Yes                    |
| Xotx5b Mut1/4 | 0.1091 | >0.10   | Yes                    |

Intermediate calculations. ANOVA table

| Source of variation          | Degrees of freedom | Sum of squares | Mean square |
|------------------------------|--------------------|----------------|-------------|
| Treatments (between columns) | 5                  | 172.90         | 34.581      |
| Residuals (within columns)   | 81                 | 1063.1         | 13.124      |
| Total                        | 86                 | 1236.0         |             |

$F = 2.635 = (MS_{treatment} / MS_{residual})$

Summary of Data

| Group         | Number of Points | Mean   | Standard Deviation | Standard Error of Mean | Median |
|---------------|------------------|--------|--------------------|------------------------|--------|
| GFP           | 15               | 9.119  | 3.194              | 0.8247                 | 8.571  |
| Xotx5b        | 15               | 6.779  | 2.891              | 0.7464                 | 6.504  |
| Xotx2         | 18               | 10.714 | 4.979              | 1.173                  | 10.148 |
| Xotx5b Mut3/1 | 16               | 7.886  | 3.590              | 0.8974                 | 6.930  |
| Xotx5b Mut2/1 | 10               | 6.847  | 2.915              | 0.9218                 | 6.171  |
| Xotx5b Mut1/4 | 13               | 8.129  | 3.057              | 0.8478                 | 8.000  |

| Group         | Minimum | Maximum | 95% Confidence Interval |        |
|---------------|---------|---------|-------------------------|--------|
|               |         |         | From                    | To     |
| GFP           | 4.762   | 15.254  | 7.350                   | 10.888 |
| Xotx5b        | 1.724   | 12.500  | 5.178                   | 8.380  |
| Xotx2         | 3.158   | 25.806  | 8.238                   | 13.190 |
| Xotx5b Mut3/1 | 2.941   | 15.909  | 5.973                   | 9.798  |
| Xotx5b Mut2/1 | 4.286   | 13.793  | 4.761                   | 8.932  |
| Xotx5b Mut1/4 | 2.564   | 13.253  | 6.282                   | 9.977  |

\* \* \*
