# Supplementary material for: A specific box switches the cell fate determining activity of XOTX2 and XOTX5b in the Xenopus retina
Source: PubMed Central journal article supplement (PMC1929070; doi:10.1186/1749-8104-2-12), 2007-06-27
Supplement: 1749-8104-2-12-S7.pdf [file 1749-8104-2-12-S7.pdf]

Amacrine cells

One-way Analysis of Variance (ANOVA)

The P value is 0.0172, considered significant.  
 Variation among column means is significantly greater than expected by chance.

Tukey-Kramer Multiple Comparisons Test

If the value of q is greater than 4.064 then the P value is less than 0.05.

| Comparison            | Mean Difference | q      | P value |        |
|-----------------------|-----------------|--------|---------|--------|
| GFP vs Xotx5b         | -0.6875         | 1.193  | ns      | P>0.05 |
| GFP vs Xotx2          | 1.872           | 2.878  | ns      | P>0.05 |
| GFP vs Xotx5bDII      | 1.323           | 2.135  | ns      | P>0.05 |
| GFP vs Xotx2DII       | -1.048          | 1.759  | ns      | P>0.05 |
| Xotx5b vs Xotx2       | 2.559           | 3.789  | ns      | P>0.05 |
| Xotx5b vs Xotx5bDII   | 2.011           | 3.113  | ns      | P>0.05 |
| Xotx5b vs Xotx2DII    | -0.3604         | 0.5786 | ns      | P>0.05 |
| Xotx2 vs Xotx5bDII    | -0.5487         | 0.7695 | ns      | P>0.05 |
| Xotx2 vs Xotx2DII     | -2.920          | 4.218  | *       | P<0.05 |
| Xotx5bDII vs Xotx2DII | -2.371          | 3.574  | ns      | P>0.05 |

| Difference           | Mean Difference | 95% Confidence Interval |         |
|----------------------|-----------------|-------------------------|---------|
|                      |                 | From                    | To      |
| GFP - Xotx5b         | -0.6875         | -3.029                  | 1.654   |
| GFP - Xotx2          | 1.872           | -0.7719                 | 4.516   |
| GFP - Xotx5bDII      | 1.323           | -1.195                  | 3.842   |
| GFP - Xotx2DII       | -1.048          | -3.468                  | 1.373   |
| Xotx5b - Xotx2       | 2.559           | -0.1861                 | 5.305   |
| Xotx5b - Xotx5bDII   | 2.011           | -0.6146                 | 4.636   |
| Xotx5b - Xotx2DII    | -0.3604         | -2.892                  | 2.171   |
| Xotx2 - Xotx5bDII    | -0.5487         | -3.447                  | 2.349   |
| Xotx2 - Xotx2DII     | -2.920          | -5.733                  | -0.1064 |
| Xotx5bDII - Xotx2DII | -2.371          | -5.067                  | 0.3251  |

Assumption test: Are the standard deviations of the groups equal?

ANOVA assumes that the data are sampled from populations with identical SDs. This assumption is tested using the method of Bartlett.

Bartlett statistic (corrected) = 18.661

The P value is 0.0009.

Bartlett's test suggests that the differences among the SDs is extremely significant.

Since ANOVA assumes populations with equal SDs, you should consider transforming your data (reciprocal or log) or selecting a nonparametric test.

Assumption test: Are the data sampled from Gaussian distributions?

ANOVA assumes that the data are sampled from populations that follow Gaussian distributions. This assumption is tested using the method Kolmogorov and Smirnov:

| Group     | KS     | P Value | Passed normality test? |
|-----------|--------|---------|------------------------|
| GFP       | 0.1353 | >0.10   | Yes                    |
| Xotx5b    | 0.2177 | >0.10   | Yes                    |
| Xotx2     | 0.2831 | >0.10   | Yes                    |
| Xotx5bDII | 0.1563 | >0.10   | Yes                    |
| Xotx2DII  | 0.2063 | >0.10   | Yes                    |

Intermediate calculations. ANOVA table

| Source of variation          | Degrees of freedom | Sum of squares | Mean square |
|------------------------------|--------------------|----------------|-------------|
| Treatments (between columns) | 4                  | 45.461         | 11.365      |
| Residuals (within columns)   | 36                 | 118.29         | 3.286       |
| Total                        | 40                 | 163.75         |             |

$F = 3.459 = (MS_{treatment} / MS_{residual})$

Summary of Data

| Group     | Number of Points | Mean   | Standard Deviation | Standard Error of Mean | Median |
|-----------|------------------|--------|--------------------|------------------------|--------|
| GFP       | 11               | 13.928 | 1.649              | 0.4971                 | 13.725 |
| Xotx5b    | 9                | 14.615 | 1.623              | 0.5410                 | 15.294 |
| Xotx2     | 6                | 12.056 | 3.521              | 1.437                  | 11.605 |
| Xotx5bDII | 7                | 12.605 | 0.9401             | 0.3553                 | 12.403 |
| Xotx2DII  | 8                | 14.976 | 0.6274             | 0.2218                 | 14.979 |

| Group     | Minimum | Maximum | 95% Confidence Interval |        |
|-----------|---------|---------|-------------------------|--------|
|           |         |         | From                    | To     |
| GFP       | 11.348  | 17.323  | 12.820                  | 15.035 |
| Xotx5b    | 11.765  | 16.552  | 13.368                  | 15.863 |
| Xotx2     | 8.333   | 18.519  | 8.360                   | 15.751 |
| Xotx5bDII | 11.203  | 13.953  | 11.735                  | 13.474 |
| Xotx2DII  | 14.338  | 16.272  | 14.451                  | 15.500 |

\* \* \*

## Bipolar cells

One-way Analysis of Variance (ANOVA)

The P value is < 0.0001, considered extremely significant.  
Variation among column means is significantly greater than expected by chance.

Tukey-Kramer Multiple Comparisons Test

If the value of q is greater than 4.064 then the P value is less than 0.05.

| Comparison            | Mean Difference | q      | P value |         |
|-----------------------|-----------------|--------|---------|---------|
| GFP vs Xotx5b         | 3.848           | 3.643  | ns      | P>0.05  |
| GFP vs Xotx2          | -6.558          | 5.497  | **      | P<0.01  |
| GFP vs Xotx5bDII      | -0.6893         | 0.6066 | ns      | P>0.05  |
| GFP vs Xotx2DII       | 0.8468          | 0.7753 | ns      | P>0.05  |
| Xotx5b vs Xotx2       | -10.406         | 8.400  | ***     | P<0.001 |
| Xotx5b vs Xotx5bDII   | -4.538          | 3.831  | ns      | P>0.05  |
| Xotx5b vs Xotx2DII    | -3.002          | 2.628  | ns      | P>0.05  |
| Xotx2 vs Xotx5bDII    | 5.868           | 4.488  | *       | P<0.05  |
| Xotx2 vs Xotx2DII     | 7.404           | 5.833  | **      | P<0.01  |
| Xotx5bDII vs Xotx2DII | 1.536           | 1.263  | ns      | P>0.05  |

| Difference           | Mean Difference | 95% Confidence Interval |        |
|----------------------|-----------------|-------------------------|--------|
|                      |                 | From                    | To     |
| GFP - Xotx5b         | 3.848           | -0.4453                 | 8.142  |
| GFP - Xotx2          | -6.558          | -11.406                 | -1.709 |
| GFP - Xotx5bDII      | -0.6893         | -5.308                  | 3.929  |
| GFP - Xotx2DII       | 0.8468          | -3.592                  | 5.286  |
| Xotx5b - Xotx2       | -10.406         | -15.441                 | -5.371 |
| Xotx5b - Xotx5bDII   | -4.538          | -9.352                  | 0.2765 |
| Xotx5b - Xotx2DII    | -3.002          | -7.643                  | 1.640  |
| Xotx2 - Xotx5bDII    | 5.868           | 0.5536                  | 11.183 |
| Xotx2 - Xotx2DII     | 7.404           | 2.245                   | 12.564 |
| Xotx5bDII - Xotx2DII | 1.536           | -3.408                  | 6.480  |

Assumption test: Are the standard deviations of the groups equal?

ANOVA assumes that the data are sampled from populations with identical SDs. This assumption is tested using the method of Bartlett.

Bartlett statistic (corrected) = 6.877

The P value is 0.1425.

Bartlett's test suggests that the differences among the SDs is not significant.

Assumption test: Are the data sampled from Gaussian distributions?

ANOVA assumes that the data are sampled from populations that follow

Gaussian distributions. This assumption is tested using the method Kolmogorov and Smirnov:

| Group     | KS     | P Value | Passed normality test? |
|-----------|--------|---------|------------------------|
| GFP       | 0.1908 | >0.10   | Yes                    |
| Xotx5b    | 0.2895 | >0.10   | Yes                    |
| Xotx2     | 0.1641 | >0.10   | Yes                    |
| Xotx5bDII | 0.2325 | >0.10   | Yes                    |
| Xotx2DII  | 0.1763 | >0.10   | Yes                    |

Intermediate calculations. ANOVA table

| Source of variation          | Degrees of freedom | Sum of squares | Mean square |
|------------------------------|--------------------|----------------|-------------|
| Treatments (between columns) | 4                  | 400.19         | 100.05      |
| Residuals (within columns)   | 36                 | 397.78         | 11.050      |
| Total                        | 40                 | 797.97         |             |

$F = 9.054 = (MStreatment/MSresidual)$

Summary of Data

| Group     | Number of Points | Mean   | Standard Deviation | Standard Error of Mean | Median |
|-----------|------------------|--------|--------------------|------------------------|--------|
| GFP       | 11               | 32.680 | 4.260              | 1.284                  | 31.915 |
| Xotx5b    | 9                | 28.831 | 2.002              | 0.6674                 | 27.861 |
| Xotx2     | 6                | 39.238 | 2.733              | 1.116                  | 39.535 |
| Xotx5bDII | 7                | 33.369 | 4.286              | 1.620                  | 35.150 |
| Xotx2DII  | 8                | 31.833 | 2.288              | 0.8091                 | 31.626 |

| Group     | Minimum | Maximum | 95% Confidence Interval |        |
|-----------|---------|---------|-------------------------|--------|
|           |         |         | From                    | To     |
| GFP       | 23.214  | 38.780  | 29.818                  | 35.541 |
| Xotx5b    | 27.273  | 33.103  | 27.292                  | 30.371 |
| Xotx2     | 35.227  | 42.424  | 36.368                  | 42.107 |
| Xotx5bDII | 26.585  | 38.365  | 29.405                  | 37.333 |
| Xotx2DII  | 29.044  | 35.470  | 29.920                  | 33.746 |

\* \* \*

Photoreceptors

One-way Analysis of Variance (ANOVA)

The P value is < 0.0001, considered extremely significant. Variation among column means is significantly greater than expected by chance.

Tukey-Kramer Multiple Comparisons Test

If the value of q is greater than 4.064 then the P value is less than 0.05.

| Comparison            | Mean Difference | q      | P value     |
|-----------------------|-----------------|--------|-------------|
| GFP vs Xotx5b         | -7.190          | 10.541 | *** P<0.001 |
| GFP vs Xotx2          | 3.824           | 4.964  | * P<0.05    |
| GFP vs Xotx5bDII      | 0.3378          | 0.4604 | ns P>0.05   |
| GFP vs Xotx2DII       | -0.8220         | 1.166  | ns P>0.05   |
| Xotx5b vs Xotx2       | 11.014          | 13.770 | *** P<0.001 |
| Xotx5b vs Xotx5bDII   | 7.528           | 9.843  | *** P<0.001 |
| Xotx5b vs Xotx2DII    | 6.368           | 8.636  | *** P<0.001 |
| Xotx2 vs Xotx5bDII    | -3.486          | 4.129  | * P<0.05    |
| Xotx2 vs Xotx2DII     | -4.646          | 5.668  | ** P<0.01   |
| Xotx5bDII vs Xotx2DII | -1.160          | 1.477  | ns P>0.05   |

| Difference           | Mean Difference | 95% Confidence Interval |          |
|----------------------|-----------------|-------------------------|----------|
|                      |                 | From                    | To       |
| GFP - Xotx5b         | -7.190          | -9.962                  | -4.418   |
| GFP - Xotx2          | 3.824           | 0.6933                  | 6.954    |
| GFP - Xotx5bDII      | 0.3378          | -2.644                  | 3.320    |
| GFP - Xotx2DII       | -0.8220         | -3.688                  | 2.044    |
| Xotx5b - Xotx2       | 11.014          | 7.763                   | 14.264   |
| Xotx5b - Xotx5bDII   | 7.528           | 4.420                   | 10.636   |
| Xotx5b - Xotx2DII    | 6.368           | 3.371                   | 9.365    |
| Xotx2 - Xotx5bDII    | -3.486          | -6.917                  | -0.05435 |
| Xotx2 - Xotx2DII     | -4.646          | -7.976                  | -1.315   |
| Xotx5bDII - Xotx2DII | -1.160          | -4.352                  | 2.032    |

Assumption test: Are the standard deviations of the groups equal?

ANOVA assumes that the data are sampled from populations with identical SDs. This assumption is tested using the method of Bartlett.

Bartlett statistic (corrected) = 2.662

The P value is 0.6159.

Bartlett's test suggests that the differences among the SDs is not significant.

Assumption test: Are the data sampled from Gaussian distributions?

ANOVA assumes that the data are sampled from populations that follow

Gaussian distributions. This assumption is tested using the method Kolmogorov and Smirnov:

| Group     | KS     | P Value | Passed normality test? |
|-----------|--------|---------|------------------------|
| GFP       | 0.1897 | >0.10   | Yes                    |
| Xotx5b    | 0.1738 | >0.10   | Yes                    |
| Xotx2     | 0.2923 | >0.10   | Yes                    |
| Xotx5bDII | 0.2100 | >0.10   | Yes                    |
| Xotx2DII  | 0.1308 | >0.10   | Yes                    |

Intermediate calculations. ANOVA table

| Source of variation          | Degrees of freedom | Sum of squares | Mean square |
|------------------------------|--------------------|----------------|-------------|
| Treatments (between columns) | 4                  | 507.65         | 126.91      |
| Residuals (within columns)   | 36                 | 165.82         | 4.606       |
| Total                        | 40                 | 673.47         |             |

$F = 27.554 = (MS_{treatment} / MS_{residual})$

Summary of Data

| Group     | Number of Points | Mean   | Standard Deviation | Standard Error of Mean | Median |
|-----------|------------------|--------|--------------------|------------------------|--------|
| GFP       | 11               | 28.146 | 2.747              | 0.8283                 | 27.386 |
| Xotx5b    | 9                | 35.337 | 1.807              | 0.6024                 | 34.826 |
| Xotx2     | 6                | 24.323 | 2.114              | 0.8629                 | 25.026 |
| Xotx5bDII | 7                | 27.809 | 1.616              | 0.6108                 | 27.444 |
| Xotx2DII  | 8                | 28.968 | 1.935              | 0.6843                 | 29.173 |

| Group     | Minimum | Maximum | 95% Confidence Interval |        |
|-----------|---------|---------|-------------------------|--------|
|           |         |         | From                    | To     |
| GFP       | 25.490  | 33.598  | 26.301                  | 29.992 |
| Xotx5b    | 33.103  | 39.216  | 33.948                  | 36.726 |
| Xotx2     | 21.212  | 26.316  | 22.104                  | 26.541 |
| Xotx5bDII | 25.581  | 30.879  | 26.314                  | 29.303 |
| Xotx2DII  | 26.471  | 32.374  | 27.350                  | 30.587 |

\* \* \*

Ganglion cells

---

 One-way Analysis of Variance (ANOVA)
 

---

The P value is 0.0087, considered very significant.  
 Variation among column means is significantly greater than expected by chance.

Tukey-Kramer Multiple Comparisons Test

If the value of q is greater than 4.064 then the P value is less than 0.05.

| Comparison            | Mean Difference | q      | P value |        |
|-----------------------|-----------------|--------|---------|--------|
| GFP vs Xotx5b         | 3.833           | 4.469  | *       | P<0.05 |
| GFP vs Xotx2          | 0.5571          | 0.5753 | ns      | P>0.05 |
| GFP vs Xotx5bDII      | -0.9476         | 1.027  | ns      | P>0.05 |
| GFP vs Xotx2DII       | 1.882           | 2.123  | ns      | P>0.05 |
| Xotx5b vs Xotx2       | -3.276          | 3.257  | ns      | P>0.05 |
| Xotx5b vs Xotx5bDII   | -4.780          | 4.971  | *       | P<0.05 |
| Xotx5b vs Xotx2DII    | -1.950          | 2.103  | ns      | P>0.05 |
| Xotx2 vs Xotx5bDII    | -1.505          | 1.417  | ns      | P>0.05 |
| Xotx2 vs Xotx2DII     | 1.325           | 1.286  | ns      | P>0.05 |
| Xotx5bDII vs Xotx2DII | 2.830           | 2.865  | ns      | P>0.05 |

| Difference           | Mean Difference | 95% Confidence Interval |         |
|----------------------|-----------------|-------------------------|---------|
|                      |                 | From                    | To      |
| GFP - Xotx5b         | 3.833           | 0.3468                  | 7.319   |
| GFP - Xotx2          | 0.5571          | -3.379                  | 4.493   |
| GFP - Xotx5bDII      | -0.9476         | -4.697                  | 2.802   |
| GFP - Xotx2DII       | 1.882           | -1.721                  | 5.486   |
| Xotx5b - Xotx2       | -3.276          | -7.363                  | 0.8120  |
| Xotx5b - Xotx5bDII   | -4.780          | -8.689                  | -0.8719 |
| Xotx5b - Xotx2DII    | -1.950          | -5.719                  | 1.818   |
| Xotx2 - Xotx5bDII    | -1.505          | -5.820                  | 2.810   |
| Xotx2 - Xotx2DII     | 1.325           | -2.863                  | 5.514   |
| Xotx5bDII - Xotx2DII | 2.830           | -1.184                  | 6.844   |

Assumption test: Are the standard deviations of the groups equal?

ANOVA assumes that the data are sampled from populations with identical SDs. This assumption is tested using the method of Bartlett.

Bartlett statistic (corrected) = 10.056

The P value is 0.0395.

Bartlett's test suggests that the differences among the SDs is significant.

Since ANOVA assumes populations with equal SDs, you should consider transforming your data (reciprocal or log) or selecting a nonparametric test.

Assumption test: Are the data sampled from Gaussian distributions?

ANOVA assumes that the data are sampled from populations that follow Gaussian distributions. This assumption is tested using the method Kolmogorov and Smirnov:

| Group     | KS     | P Value | Passed normality test? |
|-----------|--------|---------|------------------------|
| GFP       | 0.1602 | >0.10   | Yes                    |
| Xotx5b    | 0.2294 | >0.10   | Yes                    |
| Xotx2     | 0.2830 | >0.10   | Yes                    |
| Xotx5bDII | 0.2613 | >0.10   | Yes                    |
| Xotx2DII  | 0.2126 | >0.10   | Yes                    |

Intermediate calculations. ANOVA table

| Source of variation          | Degrees of freedom | Sum of squares | Mean square |
|------------------------------|--------------------|----------------|-------------|
| Treatments (between columns) | 4                  | 116.50         | 29.126      |
| Residuals (within columns)   | 36                 | 262.20         | 7.283       |
| Total                        | 40                 | 378.70         |             |

$F = 3.999 = (MS_{treatment} / MS_{residual})$

Summary of Data

| Group     | Number of Points | Mean   | Standard Deviation | Standard Error of Mean | Median |
|-----------|------------------|--------|--------------------|------------------------|--------|
| GFP       | 11               | 20.425 | 4.009              | 1.209                  | 20.000 |
| Xotx5b    | 9                | 16.592 | 1.430              | 0.4767                 | 17.094 |
| Xotx2     | 6                | 19.868 | 1.723              | 0.7036                 | 19.676 |
| Xotx5bDII | 7                | 21.372 | 2.222              | 0.8399                 | 20.930 |
| Xotx2DII  | 8                | 18.542 | 2.410              | 0.8520                 | 18.695 |

| Group     | Minimum | Maximum | 95% Confidence Interval |        |
|-----------|---------|---------|-------------------------|--------|
|           |         |         | From                    | To     |
| GFP       | 14.815  | 26.950  | 17.732                  | 23.118 |
| Xotx5b    | 13.793  | 17.969  | 15.493                  | 17.691 |
| Xotx2     | 18.182  | 21.805  | 18.059                  | 21.676 |
| Xotx5bDII | 18.239  | 23.643  | 19.317                  | 23.427 |
| Xotx2DII  | 14.957  | 22.426  | 16.527                  | 20.557 |

\* \* \*



Horizontal cells

One-way Analysis of Variance (ANOVA)

The P value is 0.4059, considered not significant.  
 Variation among column means is not significantly greater than expected by chance.

Post tests

Post tests were not calculated because the P value was greater than 0.05.

Assumption test: Are the standard deviations of the groups equal?

ANOVA assumes that the data are sampled from populations with identical SDs. This assumption is tested using the method of Bartlett.

Bartlett statistic (corrected) = 5.784

The P value is 0.2159.

Bartlett's test suggests that the differences among the SDs is not significant.

Assumption test: Are the data sampled from Gaussian distributions?

ANOVA assumes that the data are sampled from populations that follow Gaussian distributions. This assumption is tested using the method Kolmogorov and Smirnov:

| Group     | KS     | P Value | Passed normality test? |
|-----------|--------|---------|------------------------|
| GFP       | 0.3156 | >0.10   | Yes                    |
| Xotx5b    | 0.1504 | >0.10   | Yes                    |
| Xotx2     | 0.1770 | >0.10   | Yes                    |
| Xotx5bDII | 0.2845 | >0.10   | Yes                    |
| Xotx2DII  | 0.2243 | >0.10   | Yes                    |

Intermediate calculations. ANOVA table

| Source of variation          | Degrees of freedom | Sum of squares | Mean square |
|------------------------------|--------------------|----------------|-------------|
| Treatments (between columns) | 4                  | 6.527          | 1.632       |
| Residuals (within columns)   | 36                 | 57.121         | 1.587       |
| Total                        | 40                 | 63.648         |             |

$F = 1.028 = (MS_{treatment} / MS_{residual})$

Summary of Data

| Group  | Number of Points | Mean  | Standard Deviation | Standard Error of Mean | Median |
|--------|------------------|-------|--------------------|------------------------|--------|
| GFP    | 11               | 4.822 | 1.633              | 0.4923                 | 4.965  |
| Xotx5b | 9                | 4.625 | 0.8130             | 0.2710                 | 4.430  |

|           |   |       |        |        |       |
|-----------|---|-------|--------|--------|-------|
| Xotx2     | 6 | 4.517 | 1.530  | 0.6245 | 4.356 |
| Xotx5bDII | 7 | 4.845 | 0.8257 | 0.3121 | 4.564 |
| Xotx2DII  | 8 | 5.681 | 1.158  | 0.4092 | 5.370 |

| Group     | Minimum | Maximum | 95% Confidence Interval |       |
|-----------|---------|---------|-------------------------|-------|
|           |         |         | From                    | To    |
| =====     | =====   | =====   | =====                   | ===== |
| GFP       | 2.397   | 8.929   | 3.725                   | 5.918 |
| Xotx5b    | 3.448   | 6.061   | 4.000                   | 5.250 |
| Xotx2     | 2.256   | 6.366   | 2.911                   | 6.122 |
| Xotx5bDII | 4.070   | 6.394   | 4.081                   | 5.609 |
| Xotx2DII  | 4.250   | 7.721   | 4.713                   | 6.649 |

\* \* \*
