# Supplementary material for: A specific box switches the cell fate determining activity of XOTX2 and XOTX5b in the Xenopus retina
Source: PubMed Central journal article supplement (PMC1929070; doi:10.1186/1749-8104-2-12), 2007-06-27
Supplement: 1749-8104-2-12-S10.pdf [file 1749-8104-2-12-S10.pdf]

amacrine cells

One-way Analysis of Variance (ANOVA)

The P value is 0.4142, considered not significant.  
 Variation among column means is not significantly greater than expected by chance.

Post tests

Post tests were not calculated because the P value was greater than 0.05.

Assumption test: Are the standard deviations of the groups equal?

ANOVA assumes that the data are sampled from populations with identical SDs. This assumption is tested using the method of Bartlett.

Bartlett statistic (corrected) = 3.957

The P value is 0.1383.

Bartlett's test suggests that the differences among the SDs is not significant.

Assumption test: Are the data sampled from Gaussian distributions?

ANOVA assumes that the data are sampled from populations that follow Gaussian distributions. This assumption is tested using the method Kolmogorov and Smirnov:

| Group     | KS     | P Value | Passed normality test? |
|-----------|--------|---------|------------------------|
| GFP       | 0.1411 | >0.10   | Yes                    |
| otd box5b | 0.2288 | >0.10   | Yes                    |
| otd box2  | 0.2530 | >0.10   | Yes                    |

Intermediate calculations. ANOVA table

| Source of variation          | Degrees of freedom | Sum of squares | Mean square |
|------------------------------|--------------------|----------------|-------------|
| Treatments (between columns) | 2                  | 16.165         | 8.083       |
| Residuals (within columns)   | 21                 | 184.63         | 8.792       |
| Total                        | 23                 | 200.80         |             |

$F = 0.9193 = (MS_{\text{treatment}} / MS_{\text{residual}})$

Summary of Data

| Group     | Number of Points | Mean   | Standard Deviation | Standard Error of Mean | Median |
|-----------|------------------|--------|--------------------|------------------------|--------|
| GFP       | 6                | 14.035 | 1.398              | 0.5707                 | 14.063 |
| otd box5b | 9                | 14.926 | 3.547              | 1.182                  | 16.312 |
| otd box2  | 9                | 16.108 | 3.046              | 1.015                  | 17.164 |

| Group     | Minimum | Maximum | 95% Confidence Interval |        |
|-----------|---------|---------|-------------------------|--------|
|           |         |         | From                    | To     |
| =====     | =====   | =====   | =====                   | =====  |
| GFP       | 11.856  | 15.652  | 12.568                  | 15.503 |
| otd box5b | 6.780   | 18.852  | 12.200                  | 17.653 |
| otd box2  | 10.127  | 20.000  | 13.767                  | 18.449 |

\* \* \*

bipolar cells

One-way Analysis of Variance (ANOVA)

The P value is < 0.0001, considered extremely significant. Variation among column means is significantly greater than expected by chance.

Tukey-Kramer Multiple Comparisons Test

If the value of q is greater than 3.567 then the P value is less than 0.05.

| Comparison            | Mean Difference | q     | P value     |
|-----------------------|-----------------|-------|-------------|
| GFP vs otd box5b      | 4.169           | 3.318 | ns P>0.05   |
| GFP vs otd box2       | -6.652          | 5.294 | ** P<0.01   |
| otd box5b vs otd box2 | -10.820         | 9.629 | *** P<0.001 |

| Difference           | Mean Difference | 95% Confidence Interval |        |
|----------------------|-----------------|-------------------------|--------|
|                      |                 | From                    | To     |
| GFP - otd box5b      | 4.169           | -0.3122                 | 8.649  |
| GFP - otd box2       | -6.652          | -11.132                 | -2.171 |
| otd box5b - otd box2 | -10.820         | -14.828                 | -6.812 |

Assumption test: Are the standard deviations of the groups equal?

ANOVA assumes that the data are sampled from populations with identical SDs. This assumption is tested using the method of Bartlett.

Bartlett statistic (corrected) = 0.9578

The P value is 0.6195.

Bartlett's test suggests that the differences among the SDs is not significant.

Assumption test: Are the data sampled from Gaussian distributions?

ANOVA assumes that the data are sampled from populations that follow Gaussian distributions. This assumption is tested using the method Kolmogorov and Smirnov:

| Group     | KS     | P Value | Passed normality test? |
|-----------|--------|---------|------------------------|
| GFP       | 0.1276 | >0.10   | Yes                    |
| otd box5b | 0.2065 | >0.10   | Yes                    |
| otd box2  | 0.1533 | >0.10   | Yes                    |

Intermediate calculations. ANOVA table

| Source of variation | Degrees of freedom | Sum of squares | Mean square |
|---------------------|--------------------|----------------|-------------|
| =====               | =====              | =====          | =====       |

|                              |    |        |        |
|------------------------------|----|--------|--------|
| Treatments (between columns) | 2  | 533.78 | 266.89 |
| Residuals (within columns)   | 21 | 238.66 | 11.365 |
| -----                        |    |        |        |
| Total                        | 23 | 772.44 |        |

F = 23.484 =(MStreatment/MSresidual)

---

Summary of Data

---

| Group     | Number<br>of<br>Points | Mean   | Standard<br>Deviation | Standard<br>Error of<br>Mean | Median |
|-----------|------------------------|--------|-----------------------|------------------------------|--------|
| =====     | =====                  | =====  | =====                 | =====                        | =====  |
| GFP       | 6                      | 32.685 | 3.650                 | 1.490                        | 32.302 |
| otd box5b | 9                      | 28.516 | 3.784                 | 1.261                        | 27.049 |
| otd box2  | 9                      | 39.336 | 2.681                 | 0.8937                       | 40.000 |

| Group     | Minimum | Maximum | 95% Confidence Interval |        |
|-----------|---------|---------|-------------------------|--------|
|           |         |         | From                    | To     |
| =====     | =====   | =====   | =====                   | =====  |
| GFP       | 28.261  | 38.415  | 28.853                  | 36.516 |
| otd box5b | 24.528  | 36.441  | 25.608                  | 31.425 |
| otd box2  | 35.753  | 43.284  | 37.276                  | 41.397 |

\* \* \*

photoreceptors

One-way Analysis of Variance (ANOVA)

The P value is < 0.0001, considered extremely significant.  
 Variation among column means is significantly greater than expected by chance.

Tukey-Kramer Multiple Comparisons Test

If the value of q is greater than 3.567 then the P value is less than 0.05.

| Comparison            | Mean Difference | q     | P value     |
|-----------------------|-----------------|-------|-------------|
| GFP vs otd box5b      | -5.610          | 5.449 | ** P<0.01   |
| GFP vs otd box2       | 1.703           | 1.654 | ns P>0.05   |
| otd box5b vs otd box2 | 7.313           | 7.941 | *** P<0.001 |

| Difference           | Mean Difference | 95% Confidence Interval |        |
|----------------------|-----------------|-------------------------|--------|
|                      |                 | From                    | To     |
| GFP - otd box5b      | -5.610          | -9.282                  | -1.938 |
| GFP - otd box2       | 1.703           | -1.969                  | 5.375  |
| otd box5b - otd box2 | 7.313           | 4.029                   | 10.597 |

Assumption test: Are the standard deviations of the groups equal?

ANOVA assumes that the data are sampled from populations with identical SDs. This assumption is tested using the method of Bartlett.

Bartlett statistic (corrected) = 2.409

The P value is 0.2999.

Bartlett's test suggests that the differences among the SDs is not significant.

Assumption test: Are the data sampled from Gaussian distributions?

ANOVA assumes that the data are sampled from populations that follow Gaussian distributions. This assumption is tested using the method Kolmogorov and Smirnov:

| Group     | KS     | P Value | Passed normality test? |
|-----------|--------|---------|------------------------|
| GFP       | 0.3747 | >0.10   | Yes                    |
| otd box5b | 0.2457 | >0.10   | Yes                    |
| otd box2  | 0.1799 | >0.10   | Yes                    |

Intermediate calculations. ANOVA table

| Source of variation | Degrees of freedom | Sum of squares | Mean square |
|---------------------|--------------------|----------------|-------------|
| =====               | =====              | =====          | =====       |

|                              |    |        |        |
|------------------------------|----|--------|--------|
| Treatments (between columns) | 2  | 257.83 | 128.91 |
| Residuals (within columns)   | 21 | 160.27 | 7.632  |
| -----                        |    |        |        |
| Total                        | 23 | 418.10 |        |

F = 16.891 =(MStreatment/MSresidual)

---

Summary of Data

---

| Group     | Number<br>of<br>Points | Mean   | Standard<br>Deviation | Standard<br>Error of<br>Mean | Median |
|-----------|------------------------|--------|-----------------------|------------------------------|--------|
| =====     | =====                  | =====  | =====                 | =====                        | =====  |
| GFP       | 6                      | 28.056 | 3.256                 | 1.329                        | 27.053 |
| otd box5b | 9                      | 33.666 | 1.859                 | 0.6197                       | 34.091 |
| otd box2  | 9                      | 26.353 | 3.155                 | 1.052                        | 25.714 |

| Group     | Minimum | Maximum | 95% Confidence Interval |        |
|-----------|---------|---------|-------------------------|--------|
|           |         |         | From                    | To     |
| =====     | =====   | =====   | =====                   | =====  |
| GFP       | 25.887  | 34.536  | 24.638                  | 31.473 |
| otd box5b | 29.661  | 36.066  | 32.236                  | 35.095 |
| otd box2  | 23.116  | 32.258  | 23.928                  | 28.778 |

\* \* \*

ganglion cells

One-way Analysis of Variance (ANOVA)

The P value is 0.0015, considered very significant.  
 Variation among column means is significantly greater than expected by chance.

Tukey-Kramer Multiple Comparisons Test

If the value of q is greater than 3.567 then the P value is less than 0.05.

| Comparison            | Mean Difference | q     | P value   |
|-----------------------|-----------------|-------|-----------|
| GFP vs otd box5b      | 2.625           | 2.607 | ns P>0.05 |
| GFP vs otd box2       | 5.917           | 5.878 | ** P<0.01 |
| otd box5b vs otd box2 | 3.292           | 3.656 | * P<0.05  |

| Difference           | Mean Difference | 95% Confidence Interval |       |
|----------------------|-----------------|-------------------------|-------|
|                      |                 | From                    | To    |
| GFP - otd box5b      | 2.625           | -0.9654                 | 6.215 |
| GFP - otd box2       | 5.917           | 2.327                   | 9.507 |
| otd box5b - otd box2 | 3.292           | 0.08095                 | 6.503 |

Assumption test: Are the standard deviations of the groups equal?

ANOVA assumes that the data are sampled from populations with identical SDs. This assumption is tested using the method of Bartlett.

Bartlett statistic (corrected) = 0.7457

The P value is 0.6888.

Bartlett's test suggests that the differences among the SDs is not significant.

Assumption test: Are the data sampled from Gaussian distributions?

ANOVA assumes that the data are sampled from populations that follow Gaussian distributions. This assumption is tested using the method Kolmogorov and Smirnov:

| Group     | KS     | P Value | Passed normality test? |
|-----------|--------|---------|------------------------|
| GFP       | 0.2270 | >0.10   | Yes                    |
| otd box5b | 0.3022 | >0.10   | Yes                    |
| otd box2  | 0.1879 | >0.10   | Yes                    |

Intermediate calculations. ANOVA table

| Source of variation | Degrees of freedom | Sum of squares | Mean square |
|---------------------|--------------------|----------------|-------------|
| =====               | =====              | =====          | =====       |

|                              |    |        |        |
|------------------------------|----|--------|--------|
| Treatments (between columns) | 2  | 130.86 | 65.430 |
| Residuals (within columns)   | 21 | 153.23 | 7.296  |
| -----                        |    |        |        |
| Total                        | 23 | 284.09 |        |

F = 8.967 = (MS<sub>treatment</sub>/MS<sub>residual</sub>)

---

Summary of Data

---

| Group     | Number<br>of<br>Points | Mean   | Standard<br>Deviation | Standard<br>Error of<br>Mean | Median |
|-----------|------------------------|--------|-----------------------|------------------------------|--------|
| =====     | =====                  | =====  | =====                 | =====                        | =====  |
| GFP       | 6                      | 20.614 | 3.303                 | 1.349                        | 21.305 |
| otd box5b | 9                      | 17.989 | 2.330                 | 0.7765                       | 18.644 |
| otd box2  | 9                      | 14.697 | 2.628                 | 0.8760                       | 14.241 |

| Group     | Minimum | Maximum | 95% Confidence Interval |        |
|-----------|---------|---------|-------------------------|--------|
|           |         |         | From                    | To     |
| =====     | =====   | =====   | =====                   | =====  |
| GFP       | 16.495  | 24.457  | 17.147                  | 24.081 |
| otd box5b | 12.295  | 20.455  | 16.198                  | 19.780 |
| otd box2  | 11.429  | 18.593  | 12.677                  | 16.717 |

\* \* \*



horizontal cells

One-way Analysis of Variance (ANOVA)

The P value is 0.2604, considered not significant.  
 Variation among column means is not significantly greater than expected by chance.

Post tests

Post tests were not calculated because the P value was greater than 0.05.

Assumption test: Are the standard deviations of the groups equal?

ANOVA assumes that the data are sampled from populations with identical SDs. This assumption is tested using the method of Bartlett.

Bartlett statistic (corrected) = 1.734

The P value is 0.4203.

Bartlett's test suggests that the differences among the SDs is not significant.

Assumption test: Are the data sampled from Gaussian distributions?

ANOVA assumes that the data are sampled from populations that follow Gaussian distributions. This assumption is tested using the method Kolmogorov and Smirnov:

| Group     | KS     | P Value | Passed normality test? |
|-----------|--------|---------|------------------------|
| GFP       | 0.2357 | >0.10   | Yes                    |
| otd box5b | 0.1683 | >0.10   | Yes                    |
| otd box2  | 0.2010 | >0.10   | Yes                    |

Intermediate calculations. ANOVA table

| Source of variation          | Degrees of freedom | Sum of squares | Mean square |
|------------------------------|--------------------|----------------|-------------|
| Treatments (between columns) | 2                  | 9.523          | 4.762       |
| Residuals (within columns)   | 21                 | 69.651         | 3.317       |
| Total                        | 23                 | 79.174         |             |

$F = 1.436 = (MS_{treatment} / MS_{residual})$

Summary of Data

| Group     | Number of Points | Mean  | Standard Deviation | Standard Error of Mean | Median |
|-----------|------------------|-------|--------------------|------------------------|--------|
| GFP       | 6                | 4.611 | 2.036              | 0.8314                 | 5.016  |
| otd box5b | 9                | 4.903 | 2.093              | 0.6978                 | 4.965  |
| otd box2  | 9                | 3.506 | 1.316              | 0.4388                 | 3.015  |

| Group     | Minimum | Maximum | 95% Confidence Interval |       |
|-----------|---------|---------|-------------------------|-------|
|           |         |         | From                    | To    |
| =====     | =====   | =====   | =====                   | ===== |
| GFP       | 1.829   | 7.216   | 2.473                   | 6.748 |
| otd box5b | 2.198   | 8.475   | 3.294                   | 6.512 |
| otd box2  | 1.613   | 5.970   | 2.494                   | 4.518 |

\* \* \*
